# Supplementary material for: Pds5A and Pds5B Display Non-redundant Functions in Mitosis and Their Loss Triggers Chk1 Activation
Source: PubMed Central journal article supplement (PMC7372117; doi:10.3389/fcell.2020.00531), 2020-07-14
Supplement: Image_1.pdf [file Image_1.pdf]

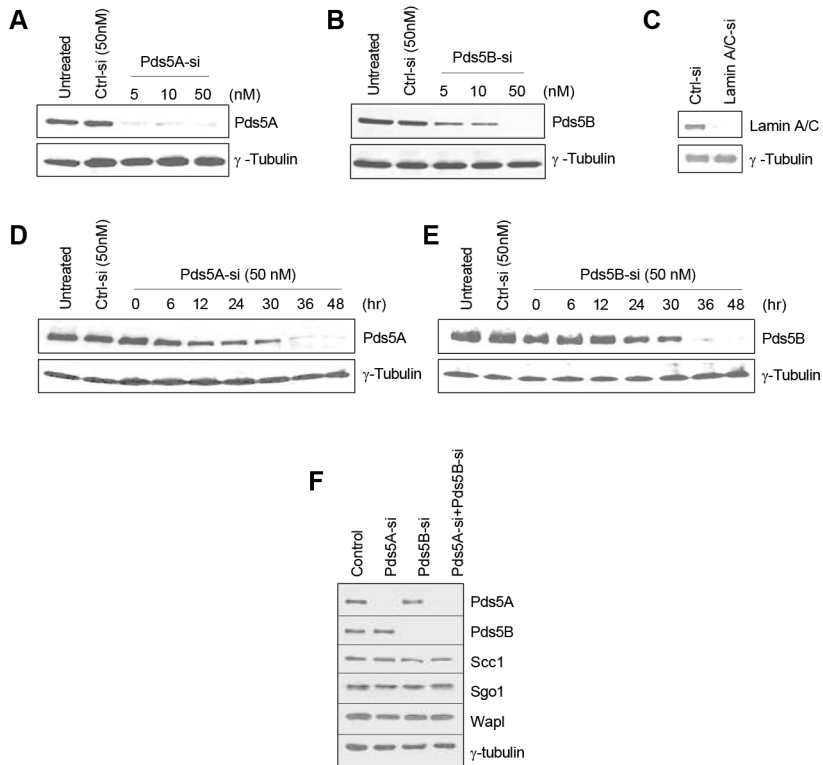

**Figure S1**
